# Supplementary figures and images for: The daily 10 kcal expenditure deficit: a before-and-after study on low-cost interventions in the work environment
Source: HighWire-hosted journal article supplement (doi:10.1136/bmjopen-2012-002125), 2013-01-01

# STAIR CLIMBING INCREASES ENERGY EXPENDITURE 11 FOLD

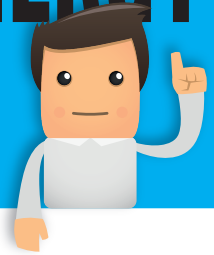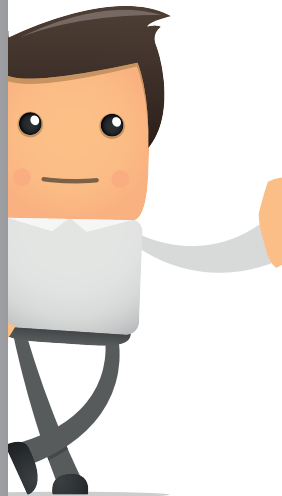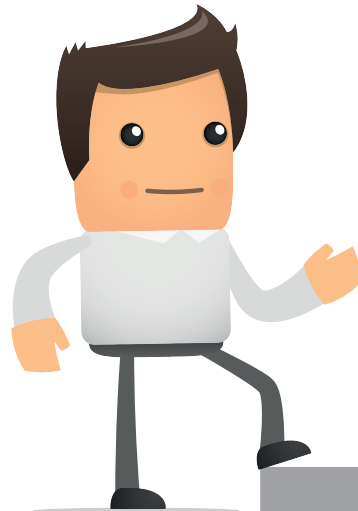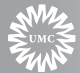

Supplement: bmjopen-2012-002125supp_appendix1.pdf [file bmjopen-2012-002125supp_appendix1.pdf]

**THE CREAM SOUP CONTAINS 30% LESS SALT AND CONTRIBUTES TO A HEALTHY BLOOD PRESSURE**

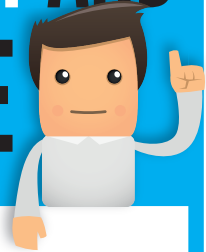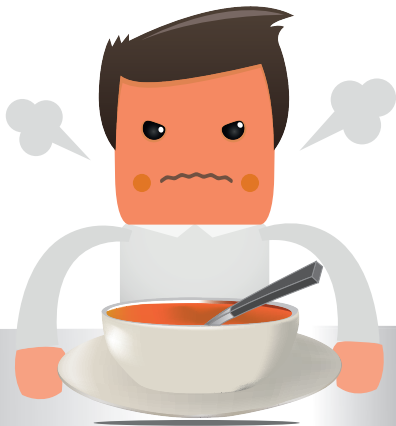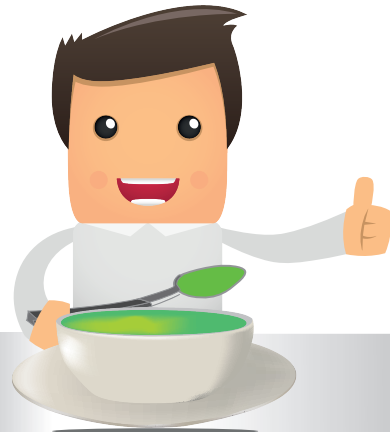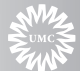

Supplement: bmjopen-2012-002125supp_appendix2.pdf [file bmjopen-2012-002125supp_appendix2.pdf]

# THE SATURATED (UNHEALTHY) FAT CONTENT OF THIS CROISSANT IS 30% LOWER

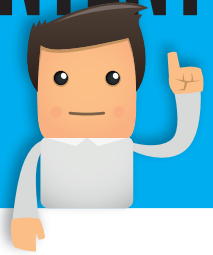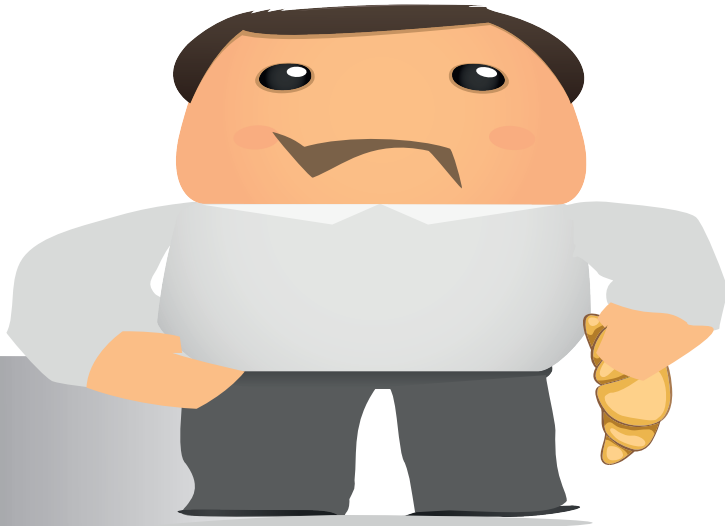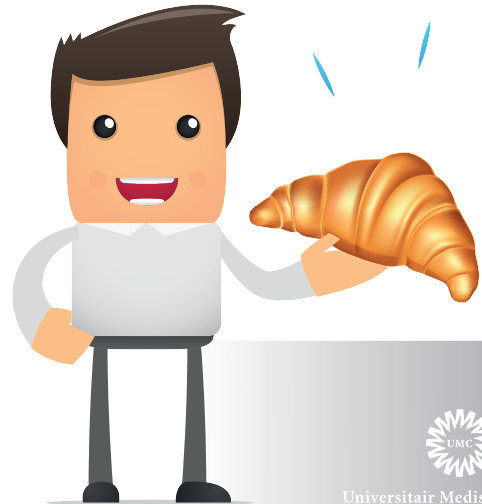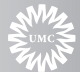

Supplement: bmjopen-2012-002125supp_appendix3.pdf [file bmjopen-2012-002125supp_appendix3.pdf]
